# Supplementary material
Source: PubMed Central journal article supplement (PMC2766921)
Supplement: NIHMS132616-supplement-1_si_001.pdf [file NIHMS132616-supplement-1_si_001.pdf]

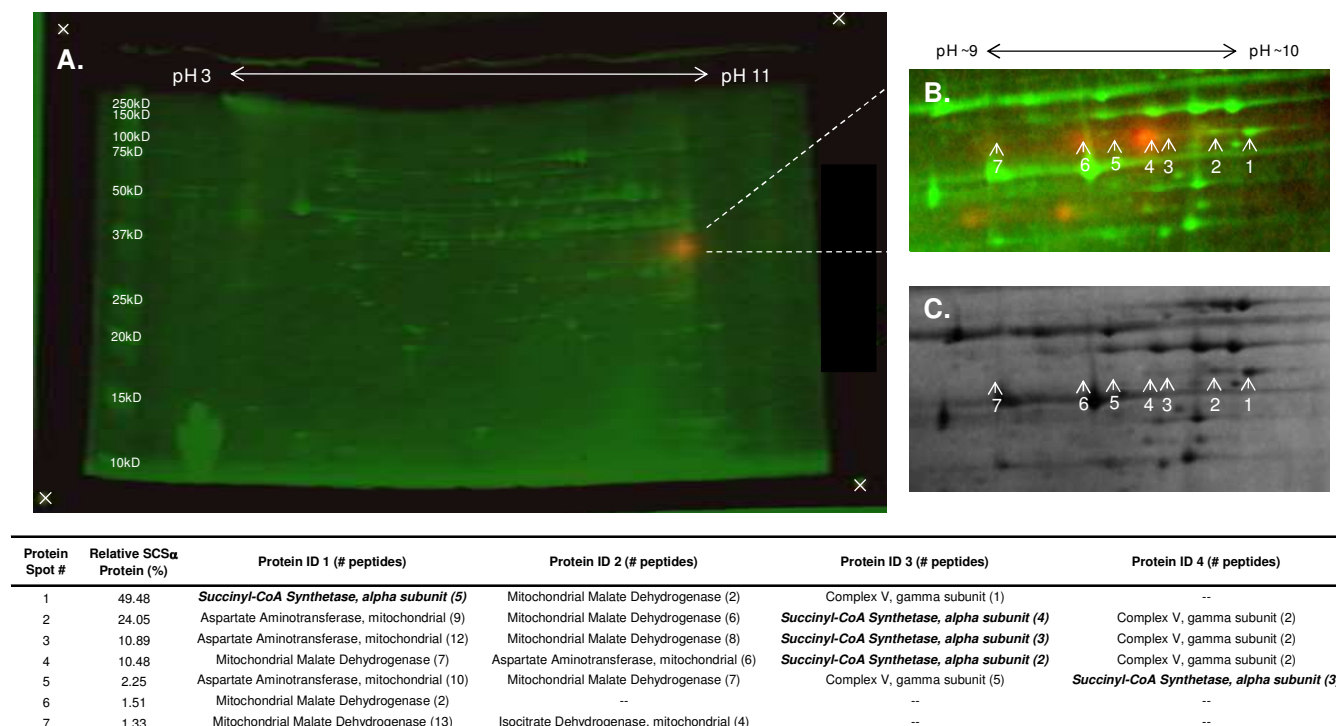

**Supplemental Figure 1.** Mass Spectrometry Identifications for  $^{32}\text{P}$ -Labeled Succinyl-CoA Synthetase,  $\alpha$ -subunit. A 2D gel electrophoresis overlay image of the Coomassie blue stained gel (green) and  $^{32}\text{P}$  labeled gel (red) (A), based on four spatial reference markers. Panel B expands the region of interest using narrow-range isoelectric focusing strips (pH 8-11 Immobiline DryStrips), and shows  $^{32}\text{P}$  incorporation relative to the seven different isoelectric variants. The Coomassie blue image in panel C represents a cold experiment run in parallel that was subsequently used to obtain mass spectrometry identifications. The inset table provides the relative distribution of SCS $\alpha$  protein content and the top four protein identifications for each isoelectric variant. Approximately 50% of SCS $\alpha$  is shifted relative to the native protein, with strong  $^{32}\text{P}$ -incorporation observed for more than 25% of the protein.
